# Supplementary material for: Effects of the Surface Charge of Graphene Oxide Derivatives on Ocular Compatibility
Source: Nanomaterials (Basel). 2022 Feb 22;12(5):735. doi: 10.3390/nano12050735 (PMC8911648; doi:10.3390/nano12050735)
Supplement: Supplementary file 1 [file nanomaterials-12-00735-s001.zip › nanomaterials-1539787-supplementary.pdf]

# Effects of the Surface Charge of Graphene Oxide Derivatives on Ocular Compatibility

Liyuan Rong <sup>1,2,†</sup>, Yan Fu <sup>3,†</sup>, Qiyu Li <sup>2</sup>, Xinji Yang <sup>1</sup>, Yueyue Li <sup>1</sup>, Liang Yan <sup>4,\*</sup>, Liqiang Wang <sup>1,\*</sup> and Wei Wu <sup>1,2,\*</sup>

<sup>1</sup> Senior Department of Ophthalmology, the Third Medical Center of PLA General Hospital, Beijing 100143, China; liyuan\_rong@outlook.com (L.R.); yangxinji68@sina.com (X.Y.); liyueyue\_7909@163.com (Y.L.)

<sup>2</sup> Department of Ophthalmology, Southwest Hospital, Third Military Medical University (Army Medical University), Chongqing 400038, China; lqy111cy@126.com

<sup>3</sup> The General Hospital of Western Theater Command, Chengdu 610000, China; fuyansmile@163.com

<sup>4</sup> CAS Key Laboratory for Biomedical Effects of Nanomaterials and Nanosafety, Institute of High Energy Physics and National Center for Nanoscience and Technology, Chinese Academy of Sciences, Beijing 100049, China

\* Correspondence: yanliang@ihep.ac.cn (L.Y.); liqiangw301@gmail.com (L.W.); wuwei1@301hospital.com.cn (W.W.)

† These authors contributed equally to this work.

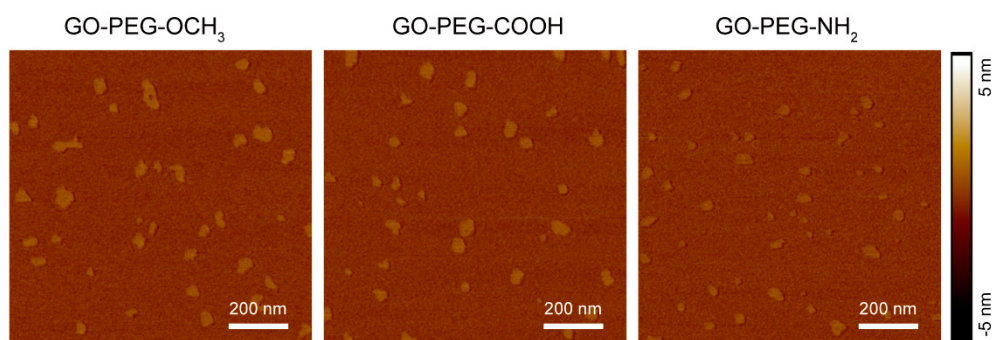

**Figure S1.** Atomic force microscopy (AFM) images of GO-PEG-OCH<sub>3</sub>, GO-PEG-COOH and GO-PEG-NH<sub>2</sub>, respectively. (AFM was performed as previously [22])
